# Supplementary material for: Spin dynamics in a Heisenberg weak antiferromagnetic chain of an iodide-bridged Cu(ii) complex
Source: Royal Society of Chemistry journal article supplement (doi:10.1039/d3dt01840g), 2023-01-01
Supplement: d3dt01840g1.pdf [file d3dt01840g1.pdf]

Supporting Information for  
**Spin dynamics in a Heisenberg weak antiferromagnetic chain  
of an iodide-bridged Cu(II) complex**

Masanori Wakizaka,<sup>1\*</sup> Mirosław Arczyński,<sup>2</sup> Shraddha Gupta,<sup>2</sup> Shinya Takaishi,<sup>2</sup> and Masahiro Yamashita<sup>2,3\*</sup>

<sup>1</sup> Frontier Research Institute for Interdisciplinary Sciences, Tohoku University, 6-3 Aramaki-Aza-Aoba, Aoba-Ku, Sendai 980-8578, Japan.

<sup>2</sup> Department of Chemistry, Graduate School of Science Tohoku University 6-3 Aramaki-Aza-Aoba, Aoba-Ku, Sendai 980-8578. Fax: +81-22-795-6548; Tel: +81-22-795-6545.

<sup>3</sup> School of Materials Science and Engineering, Nankai University Tianjin 300350, P. R. China.

Email: ma-wakiz@photon.chitose.ac.jp, yamasita@agnus.chem.tohoku.ac.jp

## Contents

|    |                                                                                                                                         |
|----|-----------------------------------------------------------------------------------------------------------------------------------------|
| 1  | <b>Methods</b>                                                                                                                          |
| 2  | <b>Table S1.</b> Crystallographic data for $[\text{Cu}^{\text{II}}(\text{chxn})_2\text{I}]\text{I}$                                     |
| 3  | <b>Figure S1.</b> PXRD of $[\text{Cu}^{\text{II}}(\text{chxn})_2\text{I}]\text{I}$                                                      |
| 4  | <b>Figure S2.</b> Bond lengths and angles around the Cu(II) center                                                                      |
| 5  | <b>Figure S3.</b> The log-scale plot of $\chi_m T$                                                                                      |
| 6  | <b>Table S2.</b> Cartesian coordinates of $[\text{Cu}^{\text{II}}(\text{chxn})_2\text{I}]\text{I}$                                      |
| 7  | <b>Table S3.</b> Summary of DFT calculation results                                                                                     |
| 8  | <b>Figure S4.</b> Temperature dependence magnetization-field curves                                                                     |
| 9  | <b>Figure S5.</b> AC susceptibility of $[\text{Cu}^{\text{II}}(\text{chxn})_2\text{I}]\text{I}$ at 1.8 K under a static magnetic fields |
| 10 | <b>Table S5.</b> AC susceptibility fitting data of $[\text{Cu}^{\text{II}}(\text{chxn})_2\text{I}]\text{I}$ at 1.8 K                    |
| 11 | <b>Figure S6.</b> AC susceptibility of $[\text{Cu}^{\text{II}}(\text{chxn})_2\text{I}]\text{I}$ under a static magnetic field of 0.6 T  |
| 12 | <b>Figure S7.</b> Cole-Cole plots                                                                                                       |
| 13 | <b>Table S6.</b> AC susceptibility fitting data of $[\text{Cu}^{\text{II}}(\text{chxn})_2\text{I}]\text{I}$ at 0.6 T                    |
| 14 | <b>References</b>                                                                                                                       |

## Methods

**Materials.** CuI, dehydrated ethanol (EtOH), and 2-propanol (2-PrOH) were purchased from Fujifilm Wako Pure Chemical Corp. 1*R*,2*R*-diaminocyclohexane (chxn) was purchased from Sigma-Aldrich.

**Synthesis of [Cu<sup>II</sup>(chxn)<sub>2</sub>I]I.** Refluxing CuI (300 mg, 1.6 mmol), chxn (580 mg, 5.1 mmol), and I (200 mg, 1.6 mmol) in EtOH (60 mL) for 1 h afforded a blue-purple solution. Following hot filtration, blue-purple needle-like crystals appeared after leaving the capped solution to stand for 3 days. The compound was obtained in a 65% yield by filtration and rapidly washing with EtOH (3 × 5 mL) and 2-PrOH (3 × 5 mL) and drying *in vacuo* overnight at room temperature. Elemental analysis calcd (%) for C<sub>12</sub>H<sub>28</sub>N<sub>4</sub>CuI<sub>2</sub> ([Cu<sup>II</sup>(chxn)<sub>2</sub>I]I): C 26.41, H 5.17, N 10.27; found: C 26.13, H 5.42, N 10.16.

**Measurements.** The elemental analysis was performed using a J-Science Lab Co. Ltd. JM11 at the Research and Analytical Center for Giant Molecules (Tohoku Univ.). PXRD measurements were carried out with Cu-K $\alpha$  radiation using a Rigaku Ultima IV diffractometer at room temperature. Magnetic measurements were performed using a magnetic property measurement system (MPMS-XL, Quantum Design) in both DC mode and AC mode. The sample was placed into a gelatin capsule (Matsuya) which was fixed in a plastic straw. ESR spectrum was recorded on a JEOL JES-X330 at X-band at room temperature.

**Collection of crystallographic data and structure refinements.** A suitable single crystal of [Cu<sup>II</sup>(chxn)<sub>2</sub>I]I was selected and mounted onto a MicroMount (MiTeGen) in an XtaLAB AFC10 diffractometer with a HyPix-6000HE hybrid pixel array detector. The crystal was kept at 120 K during data collection using a N<sub>2</sub> flow-type temperature controller. Using Olex2,<sup>S1</sup> the structure was solved with the SHELXT<sup>S2</sup> structure solution program, using intrinsic phasing, and refined with the SHELXL<sup>S3</sup> refinement package using least-squares minimization. The X-ray crystallographic

coordinates have been deposited at the Cambridge Crystallographic Data Centre (CCDC-2243196).

### **Quantum chemical calculations**

DFT calculations of the singlet and the triplet states of a dimer model,  $[\text{Cu}^{\text{II}}_2(\text{chxn})_4\text{I}_3]^+$ , were performed at an unrestricted UB3LYP/SDD level of theory. All calculations were performed using the Gaussian 16W package.<sup>33,34</sup> The atomic coordinates used were those of the crystal structure without alteration (Table S2). Calculation of the coupling constant was performed using the Heisenberg model and size-consistent spin projection (Table S3).<sup>S4</sup>

**Table S1.** Crystallographic data for [Cu<sup>II</sup>(chxn)<sub>2</sub>]I

|                                                |                                                                 |
|------------------------------------------------|-----------------------------------------------------------------|
| Formula                                        | C <sub>12</sub> H <sub>28</sub> CuI <sub>2</sub> N <sub>4</sub> |
| Formula weight                                 | 545.72                                                          |
| Crystal size (mm <sup>3</sup> )                | 0.20 × 0.05 × 0.05                                              |
| Crystal system                                 | Trigonal                                                        |
| Space group                                    | <i>P</i> 3 <sub>2</sub> 21                                      |
| <i>a</i> (Å)                                   | 9.3636(2)                                                       |
| <i>b</i> (Å)                                   | 9.3636(2)                                                       |
| <i>c</i> (Å)                                   | 18.1008(3)                                                      |
| $\alpha$ (°)                                   | 90                                                              |
| $\beta$ (°)                                    | 90                                                              |
| $\gamma$ (°)                                   | 120                                                             |
| <i>V</i> (Å <sup>3</sup> )                     | 1374.40(6)                                                      |
| <i>T</i> (K)                                   | 120                                                             |
| <i>Z</i>                                       | 3                                                               |
| <i>D</i> <sub>calc</sub> (g cm <sup>-3</sup> ) | 1.978                                                           |
| <i>F</i> (000)                                 | 789.0                                                           |
| $\lambda$ (Mo K $\alpha$ ) (Å)                 | 0.71073                                                         |
| $\mu$ (mm <sup>-1</sup> )                      | 4.556                                                           |
| Reflections collected                          | 24499                                                           |
| Data/restraints/parameters                     | 2940/0/89                                                       |
| GOF on <i>F</i> <sup>2</sup>                   | 1.060                                                           |
| <i>R</i> <sub>int</sub>                        | 0.0349                                                          |
| <i>R</i> <sub>1</sub> <sup>a</sup>             | 0.0132                                                          |
| <i>wR</i> <sub>2</sub> <sup>b</sup> (all data) | 0.0320                                                          |

<sup>a</sup>  $R_1 = \sum ||F_o| - |F_c|| / \sum |F_o|$ . <sup>b</sup>  $wR_2 = \{[\sum w(F_o^2 - F_c^2)^2] / [\sum w(F_o^2)^2]\}^{1/2}$ .

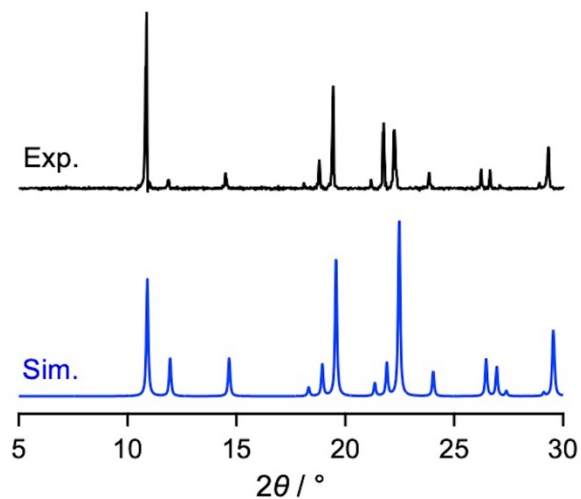

**Figure S1.** PXRD of  $[\text{Cu}^{\text{II}}(\text{chxn})_2\text{I}]\text{I}$  together with that of a simulation.

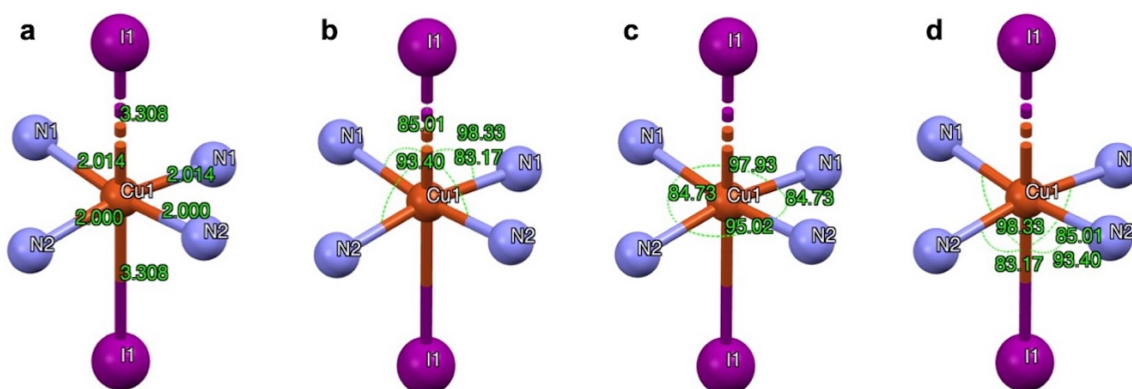

**Figure S2.** (a) Bond lengths ( $\text{\AA}$ ) and (b–d) angles ( $^\circ$ ) around the  $\text{Cu}(\text{II})$  center in  $[\text{Cu}^{\text{II}}(\text{chxn})_2\text{I}]\text{I}$ .

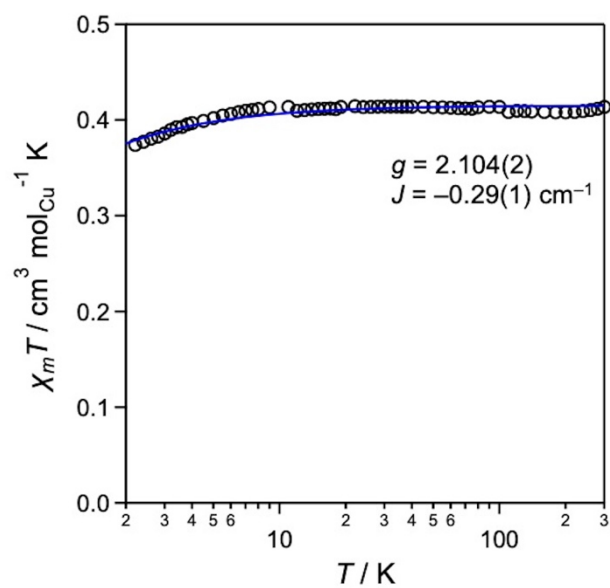

**Figure S3.** (a) The log-scale  $\chi_m T$ - $T$  plot of  $[\text{Cu}^{\text{II}}(\text{chxn})_2]\text{I}$  with a fitting curve (blue line).

**Table S2.** Cartesian coordinates of [Cu<sup>II</sup>(chxn)<sub>2</sub>I]I

| Number | Atom | x (Å)     | y (Å)     | z (Å)     |
|--------|------|-----------|-----------|-----------|
| 1      | 53   | -0.000002 | 1.338592  | -0.000007 |
| 2      | 29   | -3.061092 | 0.096401  | 0.177803  |
| 3      | 7    | -2.524748 | -0.322339 | 2.058441  |
| 4      | 1    | -1.735963 | 0.088594  | 2.250674  |
| 5      | 1    | -3.155866 | -0.008276 | 2.633995  |
| 6      | 7    | -2.614156 | -1.833584 | -0.1828   |
| 7      | 1    | -3.378648 | -2.321771 | -0.254998 |
| 8      | 1    | -2.1531   | -1.905354 | -0.964079 |
| 9      | 6    | -1.511124 | -2.170698 | 3.417835  |
| 10     | 1    | -1.911966 | -1.818443 | 4.252039  |
| 11     | 1    | -0.610828 | -1.771442 | 3.316416  |
| 12     | 6    | -2.378596 | -1.782553 | 2.23071   |
| 13     | 1    | -3.287837 | -2.177929 | 2.361583  |
| 14     | 6    | -1.7906   | -2.34252  | 0.941708  |
| 15     | 1    | -0.866699 | -1.973835 | 0.838392  |
| 16     | 6    | -0.843737 | -4.28639  | 2.219354  |
| 17     | 1    | -0.843479 | -5.274029 | 2.288856  |
| 18     | 1    | 0.091311  | -3.988381 | 2.089178  |
| 19     | 6    | -1.685524 | -3.861785 | 1.014166  |
| 20     | 1    | -1.270421 | -4.204522 | 0.182803  |
| 21     | 1    | -2.591773 | -4.252934 | 1.088504  |
| 22     | 6    | -1.391939 | -3.687649 | 3.507544  |
| 23     | 1    | -0.792438 | -3.924562 | 4.259219  |
| 24     | 1    | -2.283425 | -4.075168 | 3.695001  |
| 25     | 7    | -3.881749 | 1.865935  | 0.619484  |
| 26     | 1    | -4.731088 | 1.7427    | 0.92187   |
| 27     | 1    | -3.401796 | 2.270067  | 1.278672  |
| 28     | 7    | -3.229776 | 0.704393  | -1.7344   |
| 29     | 1    | -2.417779 | 0.966881  | -2.05023  |
| 30     | 1    | -3.531711 | 0.020167  | -2.25285  |
| 31     | 6    | -4.924356 | 3.851993  | -0.503174 |
| 32     | 1    | -4.720394 | 4.435132  | 0.270778  |
| 33     | 1    | -5.828377 | 3.470436  | -0.371324 |
| 34     | 6    | -3.902161 | 2.728751  | -0.579846 |
| 35     | 1    | -2.99513  | 3.134627  | -0.692667 |
| 36     | 6    | -4.184985 | 1.838826  | -1.783537 |
| 37     | 1    | -5.108529 | 1.468441  | -1.683144 |
| 38     | 6    | -5.137468 | 3.809395  | -3.015281 |
| 39     | 1    | -5.046358 | 4.362937  | -3.831095 |
| 40     | 1    | -6.059614 | 3.450086  | -2.990493 |
| 41     | 6    | -4.140959 | 2.649694  | -3.07389  |
| 42     | 1    | -4.360381 | 2.062736  | -3.840883 |
| 43     | 1    | -3.22707  | 3.004543  | -3.210635 |
| 44     | 6    | -4.89749  | 4.675047  | -1.785848 |
| 45     | 1    | -5.594779 | 5.376558  | -1.738775 |
| 46     | 1    | -4.018886 | 5.123766  | -1.868089 |
| 47     | 53   | -6.152933 | -0.999691 | 0.60679   |
| 48     | 29   | 3.061081  | 0.096393  | -0.177714 |
| 49     | 7    | 2.52475   | -0.322308 | -2.058446 |
| 50     | 1    | 1.735963  | 0.088559  | -2.250677 |



**Table S2.** Cartesian coordinates of [Cu<sup>II</sup>(chxn)<sub>2</sub>I]I (continue)

| Number | Atom | x (Å)    | y (Å)     | z (Å)     |
|--------|------|----------|-----------|-----------|
| 51     | 1    | 3.155864 | -0.008204 | -2.633979 |
| 52     | 7    | 2.614167 | -1.833622 | 0.182763  |
| 53     | 1    | 3.378656 | -2.321709 | 0.255001  |
| 54     | 1    | 2.153104 | -1.905348 | 0.964097  |
| 55     | 6    | 1.511124 | -2.17068  | -3.417776 |
| 56     | 1    | 1.911975 | -1.818387 | -4.252063 |
| 57     | 1    | 0.610831 | -1.77148  | -3.316386 |
| 58     | 6    | 2.378611 | -1.782596 | -2.230779 |
| 59     | 1    | 3.287846 | -2.177925 | -2.361595 |
| 60     | 6    | 1.79061  | -2.342537 | -0.941718 |
| 61     | 1    | 0.866707 | -1.973828 | -0.838397 |
| 62     | 6    | 0.843746 | -4.286389 | -2.219306 |
| 63     | 1    | 0.843501 | -5.274022 | -2.288886 |
| 64     | 1    | -0.0913  | -3.988355 | -2.089153 |
| 65     | 6    | 1.685536 | -3.861732 | -1.014151 |
| 66     | 1    | 1.270437 | -4.204554 | -0.182813 |
| 67     | 1    | 2.591791 | -4.252915 | -1.08853  |
| 68     | 6    | 1.391959 | -3.687538 | -3.507602 |
| 69     | 1    | 0.792449 | -3.924578 | -4.259191 |
| 70     | 1    | 2.283438 | -4.075131 | -3.694997 |
| 71     | 7    | 3.881739 | 1.865978  | -0.619453 |
| 72     | 1    | 4.731078 | 1.742803  | -0.921834 |
| 73     | 1    | 3.401789 | 2.270113  | -1.278679 |
| 74     | 7    | 3.229773 | 0.704363  | 1.734399  |
| 75     | 1    | 2.417778 | 0.966906  | 2.050212  |
| 76     | 1    | 3.53171  | 0.020162  | 2.252861  |
| 77     | 6    | 4.92434  | 3.851961  | 0.503192  |
| 78     | 1    | 4.720374 | 4.435193  | -0.270741 |
| 79     | 1    | 5.828361 | 3.470498  | 0.371352  |
| 80     | 6    | 3.902153 | 2.728836  | 0.579838  |
| 81     | 1    | 2.995112 | 3.13464   | 0.692731  |
| 82     | 6    | 4.184971 | 1.838833  | 1.783598  |
| 83     | 1    | 5.108519 | 1.468463  | 1.683177  |
| 84     | 6    | 5.137452 | 3.809346  | 3.015306  |
| 85     | 1    | 5.046335 | 4.362949  | 3.831155  |
| 86     | 1    | 6.059594 | 3.44999   | 2.990553  |
| 87     | 6    | 4.140951 | 2.649698  | 3.073879  |
| 88     | 1    | 4.360366 | 2.062718  | 3.840949  |
| 89     | 1    | 3.227054 | 3.004558  | 3.210678  |
| 90     | 6    | 4.897478 | 4.675013  | 1.78581   |
| 91     | 1    | 5.594752 | 5.376523  | 1.738843  |
| 92     | 1    | 4.018863 | 5.123768  | 1.868125  |
| 93     | 53   | 6.152943 | -0.999678 | -0.606844 |

**Table S3.** Summary of DFT calculation results

| State                                  | Open-shell triplet (HS) | Open-shell singlet (LS) |
|----------------------------------------|-------------------------|-------------------------|
| Electronic energy [Hartree]            | -1814.63670644          | -1814.63670723          |
| $\langle S^2 \rangle$                  | 2.0044                  | 1.0044                  |
| $E^{LS} - E^{HS}$ [ $\text{cm}^{-1}$ ] |                         | -0.17                   |
| $J$ [ $\text{cm}^{-1}$ ]               |                         | -0.17                   |

Calculations were performed using UB3LYP/SDD with the Heisenberg model and size-consistent spin projection.<sup>S4</sup>

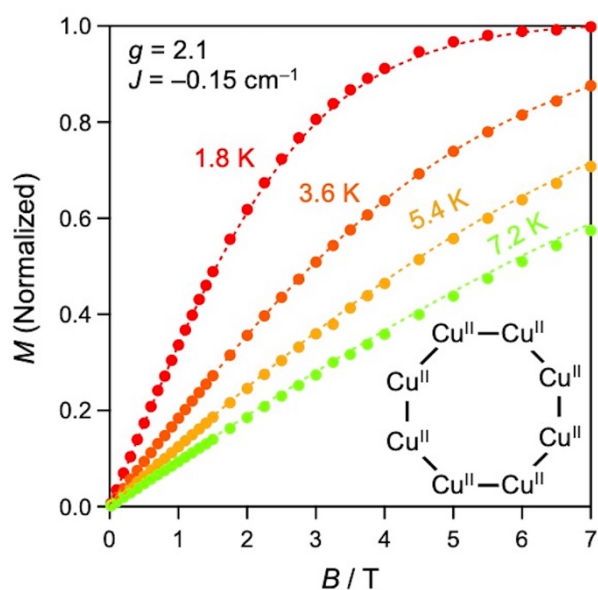

**Figure S4.** Magnetization-field curves normalized by the saturation magnetization ( $M_S$ ) at 1.8 K of  $[\text{Cu}^{\text{II}}(\text{chxn})_2]\text{I}$ . The temperature dependence was measured at 1.8, 3.6, 5.4, and 7.2 K. Dotted curves show normalized simulation curves of the 8-ring model with  $g_{\text{iso}} = 2.1$  and  $J = -0.15 \text{ cm}^{-1}$ , using the program PHI.<sup>S5</sup> Weak antiferromagnetism is confirmed like as the Eggert-Affleck-Takahashi mode (Figure 2).

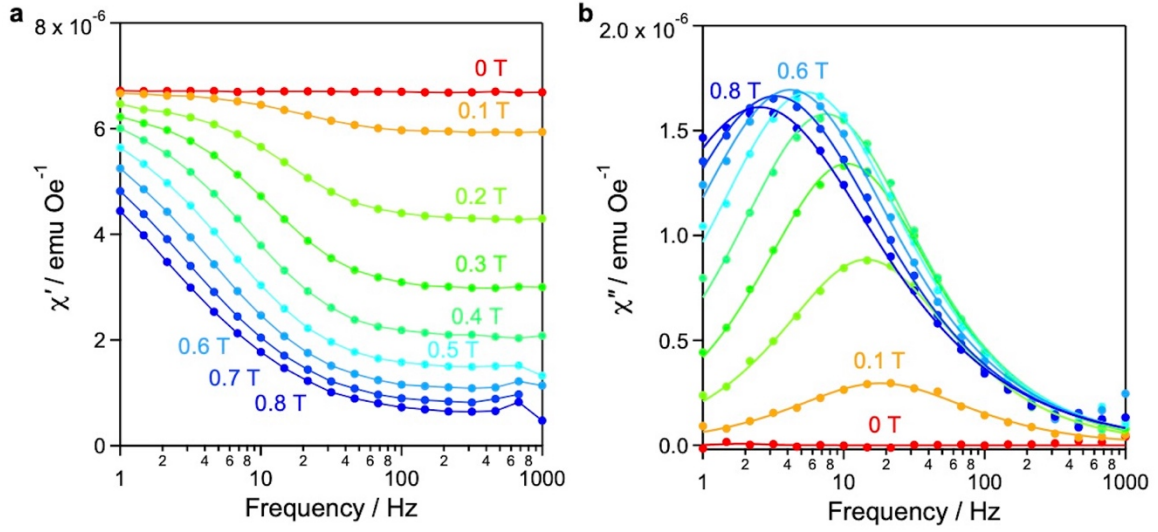

**Figure S5.** (a) The real part ( $\chi'$ ) and (b) the imaginary part ( $\chi''$ ) of AC susceptibility of  $[\text{Cu}^{\text{II}}(\text{chxn})_2]\text{I}$ , measured at 1.8 K under a static magnetic field of 0, 0.1, 0.2, 0.3, 0.4, 0.5, 0.6, 0.7, and 0.8 T. AC drive is 2.5 Oe. Each line for  $\chi''$  is a Debye relaxation fitting curve.

**Table S4.** AC susceptibility fitting data of the imaginary part of  $[\text{Cu}^{\text{II}}(\text{chxn})_2]\text{I}$  at 1.8 K

| $H$<br>[Oe] | $\chi_T - \chi_S$<br>[emu/Oe] | $\tau$ [s] | $\alpha$ | $\sigma \chi_T - \chi_S$<br>[emu/Oe] | $\sigma \tau$ [s] | $\sigma \alpha$ |
|-------------|-------------------------------|------------|----------|--------------------------------------|-------------------|-----------------|
| 0           | —                             | —          | —        | —                                    | —                 | —               |
| 1000        | 7.71E-07                      | 0.008784   | 0.16722  | 1.67E-08                             | 0.000328          | 0.0177          |
| 2000        | 2.23E-06                      | 0.011007   | 0.14547  | 2.05E-08                             | 0.000169          | 0.0076          |
| 3000        | 3.42E-06                      | 0.015118   | 0.15364  | 2.74E-08                             | 0.000201          | 0.00661         |
| 4000        | 4.31E-06                      | 0.021319   | 0.19546  | 5.34E-08                             | 4.59E-04          | 0.01            |
| 5000        | 4.87E-06                      | 0.028833   | 0.22984  | 6.05E-08                             | 6.50E-04          | 0.00973         |
| 6000        | 5.17E-06                      | 0.03819    | 0.26124  | 1.12E-07                             | 1.59E-03          | 0.016           |
| 7000        | 5.31E-06                      | 0.04875    | 0.28695  | 5.88E-08                             | 1.09E-03          | 0.00761         |
| 8000        | 5.48E-06                      | 0.062693   | 0.32286  | 9.85E-08                             | 0.00251           | 0.011           |

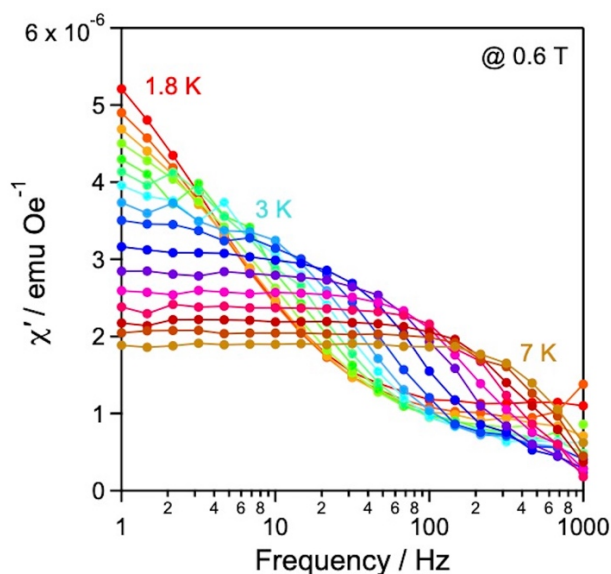

**Figure S6.** The real part ( $\chi'$ ) of AC susceptibility of  $[\text{Cu}^{\text{II}}(\text{chxn})_2]\text{I}$ , measured at 1.8, 2.0, 2.2, 2.4, 2.6, 2.8, 3.0, 3.2, 3.5, 4.0, 4.5, 5.0, 5.5, 6.0, 6.5, and 7.0 K under a static magnetic field of 0.6 T. AC drive is 2.5 Oe.

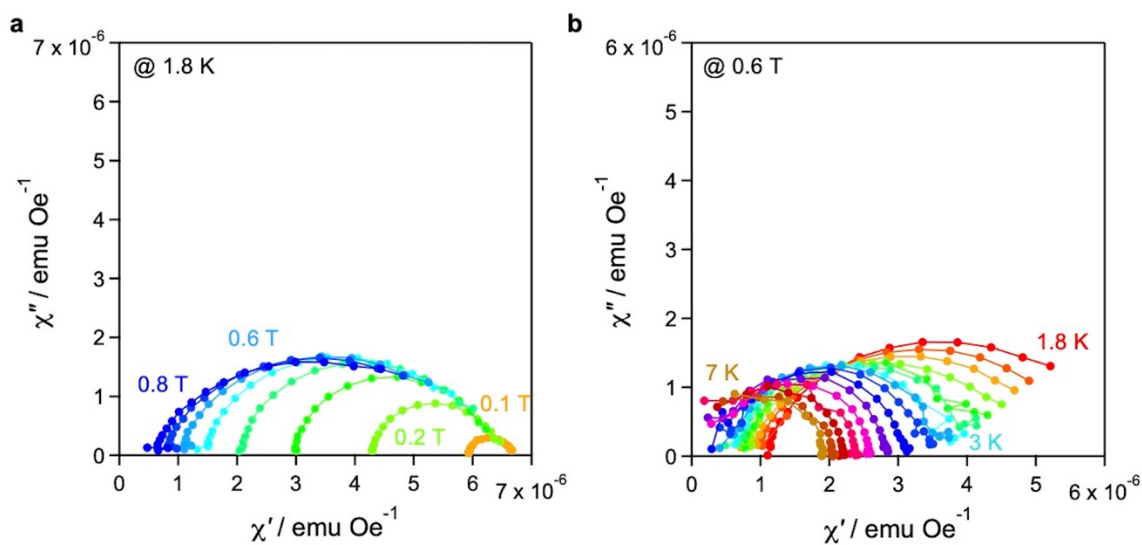

**Figure S7.** Cole-Cole plots of AC susceptibility of  $[\text{Cu}^{\text{II}}(\text{chxn})_2]\text{I}$ , measured at (a) 1.8 K under 0.1, 0.2, 0.3, 0.4, 0.5, 0.6, 0.7, and 0.8 T; and (b) at 1.8, 2.0, 2.2, 2.4, 2.6, 2.8, 3.0, 3.2, 3.5, 4.0, 4.5, 5.0, 5.5, 6.0, 6.5, and 7.0 K under 0.6 T.

**Table S5.** AC susceptibility fitting data of the imaginary part of  $[\text{Cu}^{\text{II}}(\text{chxn})_2\text{I}]\text{I}$ 

| $T$ [K] | $\chi^T - \chi^S$<br>[emu/Oe] | $\tau$ [s] | $\alpha$ | $\sigma \chi^T - \chi^S$<br>[emu/Oe] | $\sigma \tau$ [s] | $\sigma \alpha$ |
|---------|-------------------------------|------------|----------|--------------------------------------|-------------------|-----------------|
| 1.8     | 5.25E-06                      | 0.042743   | 0.2711   | 7.57E-08                             | 0.00121           | 0.0104          |
| 2       | 5.08E-06                      | 0.036096   | 0.30008  | 2.77E-07                             | 0.00404           | 0.0389          |
| 2.2     | 4.66E-06                      | 0.028777   | 0.27953  | 6.33E-08                             | 0.000768          | 0.0102          |
| 2.4     | 4.21E-06                      | 0.019849   | 0.26155  | 8.40E-08                             | 0.000758          | 0.0155          |
| 2.6     | 3.67E-06                      | 0.011736   | 0.21404  | 1.23E-07                             | 0.000712          | 0.027           |
| 2.8     | 3.61E-06                      | 0.0088516  | 0.18427  | 1.16E-07                             | 0.000502          | 0.0261          |
| 3       | 3.20E-06                      | 0.0058973  | 0.11845  | 8.73E-08                             | 0.00026           | 0.0226          |
| 3.2     | 3.23E-06                      | 0.0048614  | 0.14171  | 7.07E-08                             | 0.000178          | 0.0179          |
| 3.5     | 3.11E-06                      | 0.0032541  | 0.15057  | 8.99E-08                             | 0.000159          | 0.0237          |
| 4       | 2.74E-06                      | 0.0018165  | 0.085937 | 1.07E-07                             | 0.000107          | 0.0327          |
| 4.5     | 2.63E-06                      | 0.0010744  | 0.08542  | 7.66E-08                             | 0.0000463         | 0.0247          |
| 5       | 2.24E-06                      | 0.00078988 | 0.033971 | 2.57E-08                             | 0.0000122         | 0.00982         |
| 5.5     | 2.15E-06                      | 0.00047625 | 0        | 4.95E-08                             | 0.0000202         | –               |
| 6       | 2.01E-06                      | 0.00038646 | 0        | 1.67E-08                             | 0.00000608        | –               |
| 6.5     | 1.78E-06                      | 0.00027643 | 0        | 1.77E-08                             | 0.00000546        | –               |
| 7       | 1.78E-06                      | 0.00020308 | 0        | 3.26E-08                             | 0.00000742        | –               |

## References

- [S1] O. V. Dolomanov, L. J. Bourhis, R. J. Gildea, J. A. K. Howard, H. Puschmann, *J. Appl. Crystallogr.* 2009, **42**, 339–341.
- [S2] G. M. Sheldrick, *Acta Crystallogr. Sect. A: Found. Adv.* 2015, **A71**, 3–8.
- [S3] G. M. Sheldrick, *Acta Crystallogr., Sect. C: Struct. Chem.* 2015, **C71**, 3–8.
- [S4] Y. Kitagawa, T. Kawakami, Y. Yoshioka, K. Yamaguchi, *Polyhedron* 2001, **20**, 1189–1196.
- [S5] N. F. Chilton, R. P. Anderson, L. D. Turner, A. Soncini, K. S. Murray, *J. Comput. Chem.* 2013, **34**, 1164–1175.
